# Supplementary material for: Low temperature crystallisation of mesoporous TiO2
Source: Royal Society of Chemistry journal article supplement (doi:10.1039/c3nr03009a), 2013-01-01
Supplement: c3nr03009a.pdf [file c3nr03009a.pdf]

# Supplementary Information

## Low temperature crystallisation of mesoporous TiO<sub>2</sub>

Nanoscale, DOI: 10.1039/C3NR03009A (2013)

Peter Kohn,<sup>a</sup> Sandeep Pathak,<sup>a</sup> Morgan Stefik,<sup>b†</sup> Caterina Ducati,<sup>c</sup> Ulrich Wiesner,<sup>b</sup> Ullrich Steiner<sup>a</sup> and Stefan Guldin<sup>\*a‡</sup>

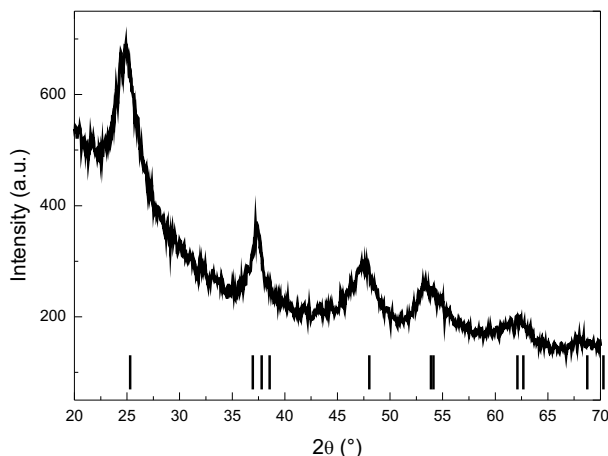

**Supplementary Figure S1** | WAXS pattern of the dried precipitate from nanocrystal synthesis. The black bars indicate expected reflection positions of anatase TiO<sub>2</sub> (PDF 71-1167).

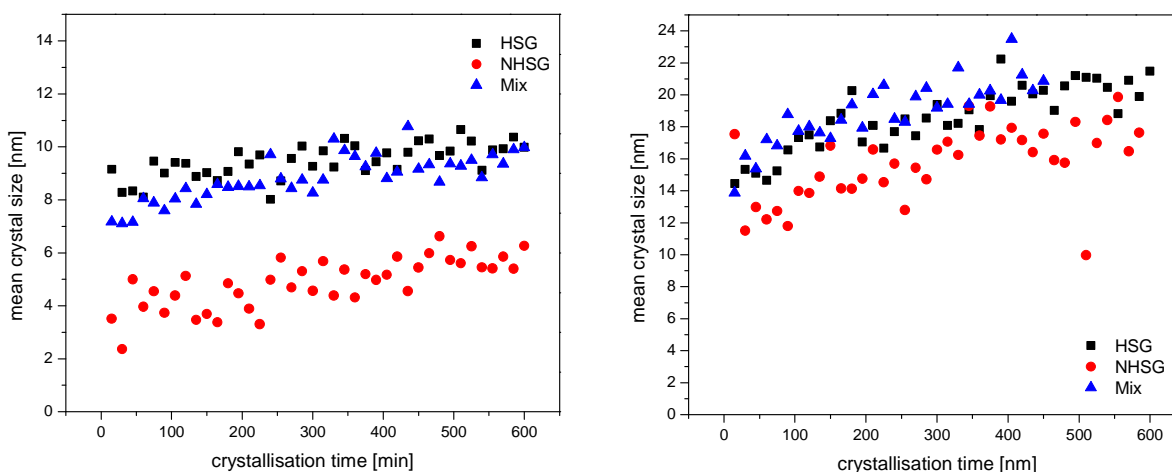

**Supplementary Figure S2** | XRD kinetics. Mean crystallite size determined from *in situ* WAXS during the annealing process at a fixed temperature of (a) 350°C and (b) 500°C.

<sup>a</sup>Cavendish Laboratory, Department of Physics, University of Cambridge, J. J. Thomson Avenue, Cambridge CB3 0HE, UK

<sup>b</sup>Department of Materials Science & Engineering, Cornell University, Ithaca, New York 14853, USA. <sup>c</sup>Department of Engineering, University of Cambridge, Trumpington Street, Cambridge CB2 1PZ, UK. <sup>†</sup>Present address: Department of Chemistry and Biochemistry, University of South Carolina, Columbia, South Carolina, 29208, USA. <sup>‡</sup>Present address: Department of Materials Science, École Polytechnique Fédérale de Lausanne, 1015 Lausanne, Switzerland. \*e-mail: Stefan.Guldin@epfl.ch

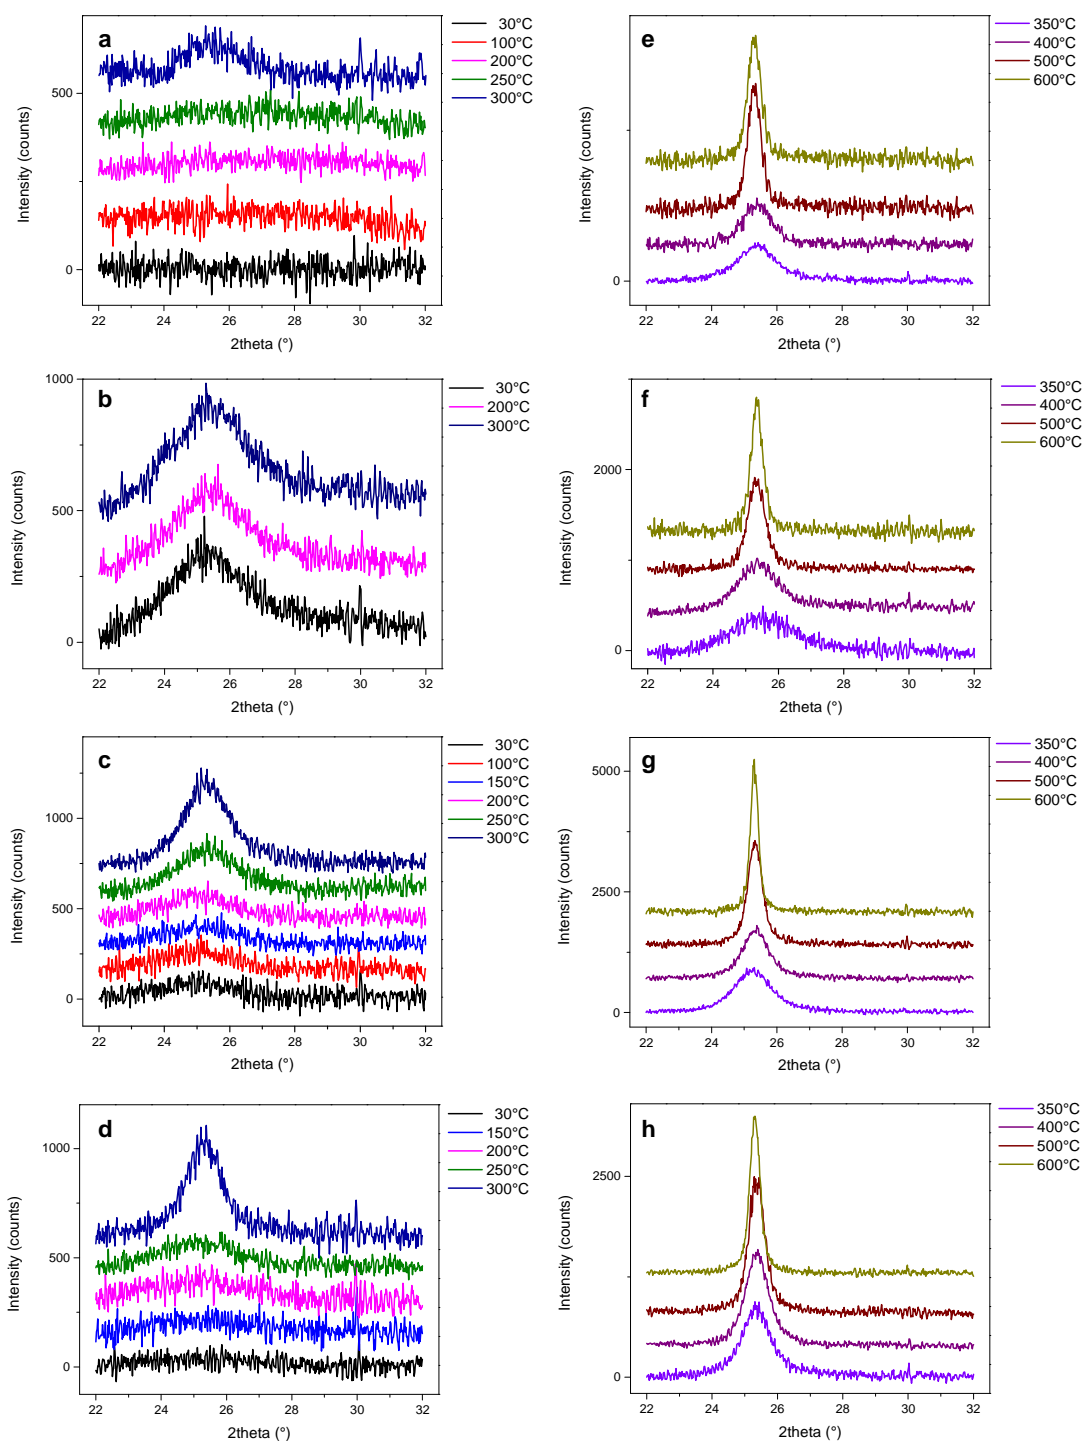

**Supplementary Figure S3** | Exemplary WAXS pattern of non-templates samples after annealing at various temperatures. (a)-(d) Overview of low temperature crystallisation for (a) HSG, (b) NHSG, (c) HSG with ligand-decorated nanocrystal seeds and (d) ligand-stripped seeds, respectively. (e)-(h) Overview for higher crystallisation temperatures. For clarity the scans were superimposed by an offset in y-direction.

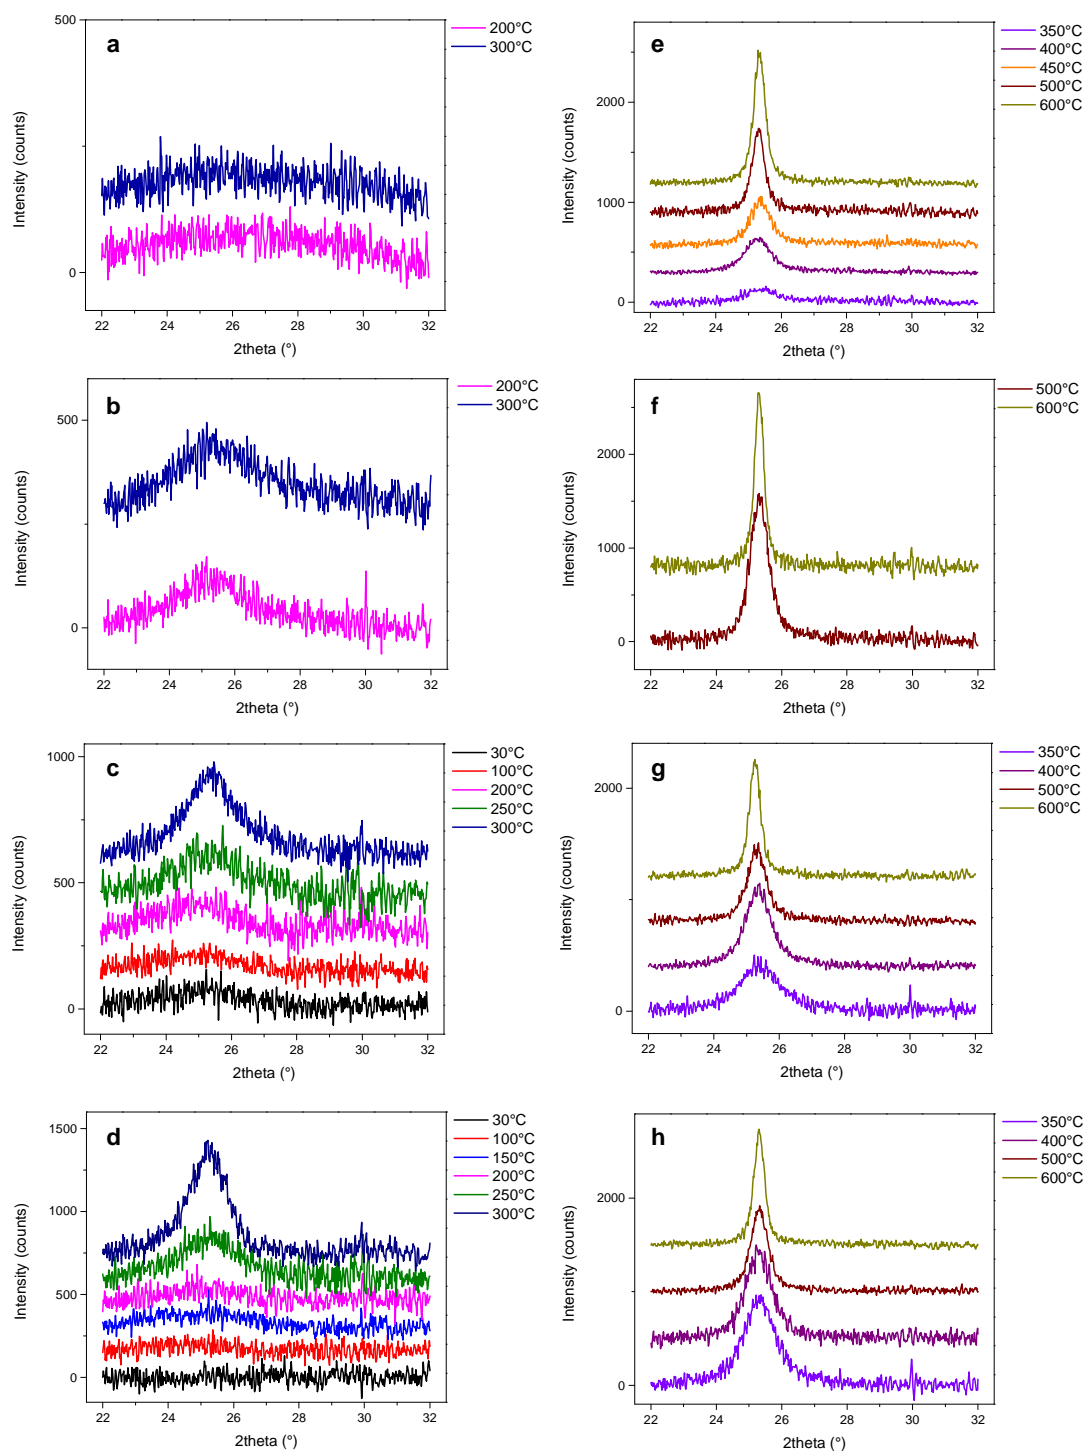

**Supplementary Figure S4** | Exemplary WAXS pattern of BCP-templated samples after annealing at various temperatures. (a)-(d) Overview of low temperature crystallisation for (a) HSG , (b) NHSG, (c) HSG with ligand-decorated nanocrystal seeds and (d) ligand-stripped seeds, respectively. (e)-(h) Overview for higher crystallisation temperatures. For clarity the scans were superimposed by an offset in y-direction.

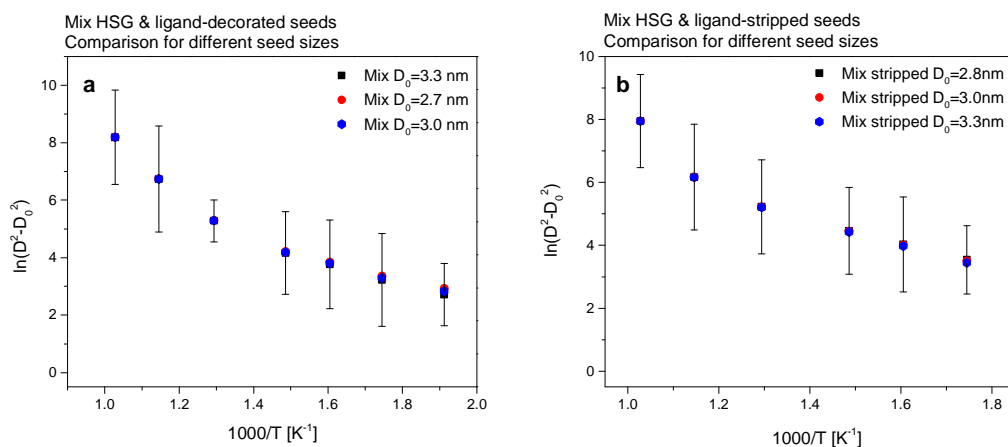

**Supplementary Figure S5** | Activation energy vs. different seed diameters for ligand-decorated and ligand-stripped seeds. (a) In the case of ligand decorated seeds  $D_0 = 3.3$  nm (mean statistical value) is compared to a seed diameter of 2.7 nm and 3 nm. For ligand-stripped seeds the mean value of 2.8 nm is plotted against an initial size of 3.0 nm and 3.3 nm, respectively. This comparison illustrates the robustness of the activation energy determination irrespective of an uncertainty in the seed diameter, yielding from a weak crystalline footprint (15 w% ) in the initial sample.
